# Supplementary material
Source: publisher figshare collection journal article supplement (https://frontiersin.figshare.com/ndownloader/files/13514378)
Supplement: Supplementary file 1 [file 13514378]

## Sheet: Table S1
	Tabla S1. Summary of intoxication and human fatalities associated with harmful algal blooms in countries from Latin America and the Caribbean Region
	Country	Years	Poisoning implicated	Causative microalgae species	Impact		References
					Human Intoxication	Fatalities
	Mexico	1972–2015	PSP	Pyrodinium bahamense, Gymnodinium catenatum	418	21	Saldate-Castañeda et al. (1991); COFEPRIS (2016); García-Mendoza et al. (2016) and references therein
		1984–2015	CFP	Unknown	664	2	Bustillos-Guzman et al. (2016) and references therein; Nuñez-Vázquez (2017)
	Guatemala	1987, 1989	PSP	Pyrodinium bahamense	194	26	Rosales-Loessener (1989), OPS (1990)
	Costa Rica	1989, 1990	PSP	Pyrodinium bahamense, Gymnodinium catenatum	84	6	Mata et al. (1990); Vargas-Montero and Freer (2002)
	Colombia		CFP	Unknown	25		Mancera-Pineda et al. (2003)
	El Salvador	2005	PSP	Pyrodinium bahamense	10	2	Barraza (2009); Licea et al. (2008)
		1989, 2000, 2001		Unknown	187	4	OPS (1990); Barraza et al. (2004); Kopper et al. (2009)
	Venezuela	1977	PSP	Two events in that year, one associated with Alexandrium tamarense (reported as Gonyaulax var. excavata) and the other with unknown species	269	11	Reyes-Vásquez et al. (1979)
		1991, 2004	PSP	Gymnodinium catenatum, Alexandrium tamarense	52	1	La Barbera (1996); La Barbera-Sánchez et al. (2008)
		1978, 1991	CFP	Unknown	60	2	La Barbera (1996)
	Nicaragua	2005	PSP	Pyrodinium bahamense	50	1	Chow et al. (2010)
	Cuba	1993-2002	PSP	Not specified	160		Mancera-Pineda et al. (2003) and references therein
		1993-2006	CFP	Gambierdiscus toxicus.The following species were also reported (although they do not cause CFP): Coolia monotis, Ostreopsis lenticularis, Prorocentrum belizeanum, Prorocentrum concavum, Prorocentrum lima and Prorocentrum mexicanum	1676	-
		1993-2006	Not specified	Not specified	2737	8
	Chile	1972-2002	PSP	Alexandrium catenella	437	26	Guzman et al. (2002); Buschman (2005)
		2002, 2010	PSP	Not specified	8	2	García et al. (2004a); Rubio et al. (2015)
		1991, 2005	DSP	Dinophysis acuta	155		Muñoz et al. (1992) and references therein; García et al. (2006)
		1970-1979, 2004	DSP	Not specified	506		Buschmann (2005); García et al. (2005)
		2002	PSP/DSP	Alexandrium catenella, Dinophysis acuta	49	2	García et al. (2004b)
	Argentina	1987-1988, 2002	PSP	Alexandrium tamarense	4	1	Esteves et al. (1992); Gayoso and Fulco (2006)
		1980, 1984-1985, 1989, 1992, 1994, 1996, 2009	PSP	Not specified	25	4	El Busto et al. (1981); Santinelli et al. (2002); Turner et al. (2014)
		1999	DSP	Prorocentrum lima	40		Gayoso et al. (2002)
		2010	DSP	Dinophysis spp.	9		Sar et al. (2010); Goya et al. (2012)
		2010	DSP	Dinophysis acuminata	2		Sar et al. (2012)
	Uruguay	1980	PSP	Probably Alexandrium sp. (reported as Gonyaulax sp.) and Gymnodinium sp.	60		Méndez and Ferrari (2002)
				TOTAL	7881	119
	References
	Barraza, J. E., Armero, J. A. and Valencia, Z. M. (2004). The red Tide Event in El Salvador. August 2001 January 2002. Rev. Biol. Trop., 52, 1 -4.
	Barraza, J. E. (2009). Food poisoning due to consumption of the marine gastropod Plicopurpura columellaris in El Salvador. Toxicon, 54, 895-896
	Barton, E. D., Tanner, P., Turchen, S. G., Tunget, C. L., Manoguerra, A. & Clark, R. F. (1995). Ciguatera fish poisoning-A Southern California epidemic. West Journal of Medicine, 163:31-35
	Buschmann, A. (2002). Marea roja y salmonicultura en el Sur de Chile. Documento 14. Fundación Oceana. 14p.
	Bustillos-Guzmán, J. J., Leyva-Valencia, I., Hernández-Sandoval, F. E., Band-Schmidt, C. J., López-Cortés, D. J., Núñez-Vázquez, E. J. (2016). "Ficotoxinas en aguas del Golfo de California: una revisión, in Florecimientos Algales Nocivos en México, eds García-Mendoza, E., Quijano-Scheggia, S. I., Olivos-Ortiz, A. and Núñez-Vázquez, E. J. Ensenada, México. CICESE. 162-179.
	Calderon, G., (2009) "Estudio de caso - Enfermedades transmitidas por alimentos en El Salvador", in Enfermedades transmitidas por alimentos y su impacto socieconómico, eds Rosell, C. Food and Agriculture Organization. Roma. 67-118. Accessed at: http://www.bvsde.paho.org/texcom/colera/ElSalvador.pdf. on 2018-06-17
	Chow, N., Vammen, K. and B. Reguera. (2012). First report of PSP on Pacific coast of Nicaragua associated with Pyrodinium bahamense. Harmful Algae News, IOC Newsletter on toxic algae and algal blooms, 41, 6-7.
	COFEPRIS, Comisión Federal para la Protección contra Riesgos Sanitarios. (2016). Proyecto de Marea Roja: Vigilancia sanitaria de moluscos bivalvos expuestos a florecimientos algales nocivos. Accessed at: https://www.gob.mx/cms/uploads/attachment/file/130052/Proyecto_Marea_Roja_COFEPRIS.pdf on 2018-06-15.
	El Busto, C. A., Ballabene, A. C., Campero, C. M., Ramirez, E. E., Villanueva, C.R. (1981). Toxina Paralizante de los moluscos del mar argentino. Acta Bioquím. Clín. Latinoam. 15: 447–456.
	Esteves, J.L., Santinelli, N., Sastre, V., Díaz, R., Rivas, O. (1992). A toxic dinoflagellate bloom and PSP production associated with upwelling in Golfo Nuevo, Patagonia, Argentina. Hydrobiología 242: 115-122.
	Ferrari, G. (2001). HABs in the Southwestern Atlantic Ocean. In Zhu, M., Zou, Y., Cheong L., & S. Hall, eds. Proceedings of the Second International Conference on Harmful Algae Management and Mitigation (November 2001, Qingdao, China), pp. 34-35. IOC UNESCO, Paris.
	García, C., Bravo, M.C., Lagos, M., Lagos, N. (2004a). Paralytic shellfish poisoning: post-mortem analysis of tissue and body fluid samples from human victims in the Patagonian fjords. Toxicon 43: 149-158.
	García, C., Mardones, P., Sfeir, A., Lagos, N. (2004b). Simultaneous presence of Paralytic and Diarrheic Shellfish Poisoning toxins in Mytilus chilensis samples collected in the Chiloe Island, Austral Chilean Fjords. Biological Research, 37(4, Supl. A), 721-731
	García, C., Schonstedt, V., Santelices J.P., Lagos, N. (2006). High amount of dinophysistoxin-3 in Mytilus chilensis collected in Seno de Reloncaví, Chile, during massive human intoxication associated with outbreak of Vibrio parahaemolyticus. Journal of Toxicological Sciencies 31(4): 305-314.
	García, C., Truan, D., Lagos, M., Santelices, J.P., Díaz, J.C., Lagos, N. (2005). Metabolic transformation of dinophysistoxin-3 into dinophysistoxin-1 causes human intoxication by consumption of O-acyl-derivatives dinophysistoxins contaminated shellfish. Journal of Toxicological Sciencies 30(4): 287-296
	García-Mendoza, E., Quijano-Scheggia, S. I., Olivos-Ortiz, A. and Núñez-Vázquez, E. J. (2016). Florecimientos Algales Nocivos en México. Ensenada, México. CICESE. 438 p
	Gayoso, A.M. & V.K. Fulco. (2006). Occurrence patterns of Alexandrium tamarense (Lebour) Balech populations in the Golfo Nuevo (Patagonia, Argentina), with observations on ventral pore occurrence in natural and cultured cells. Harmful Algae, 5: 233-241
	Gayoso, A.M., Dover, S., Morton, S., Busman, M., Moeller, P., Fulco, V.K., Maranda, L. (2002). Diarrhetic shellfish poisoning associated with Prorocentrum lima (Dinophyceae) in Patagonian Gulfs (Argentina). Journal of Shellfish Research. 21. 461-463.
	Goya, A. Sangorrín, E., Lavigne, A., Sunesen, I., Lofeudo, S., Sar, E. (2012). Toxinas diarreicas de los moluscos: primer reporte de intoxicación alimentaria en la provincia de Buenos Aires. Revista del Colegio de Veterinarios de la Provincia de Buenos Aires. Supl. Técnico Veterinario. 50: 48-49.
	Guzman, L., Pacheco, H., Pizarro, G., Alarcón, C. (2002). "Alexandrium catenella y veneno paralizante de los mariscos en Chile" in Floraciones Algales Nocivas en el Cono Sur Americano, eds Sar, E. A., Ferrario, M. E., Reguera, B. Instituto Español de Oceanografía. 237-256.
	Kopper, G., Calderón, G., Schneider, S., Domínguez, W., Gutiérrez, G. (2009). Enfermedades trasmitidas por alimentos y su impacto socioeconómico. Estudios de caso en Costa Rica, El Salvador, Guatemala, Honduras y Nicaragua. Organización de las Naciones Unidas para la Agricultura y la Alimentación. Roma. 197 p.
	La Barbera, A. (1996). "Brotes de biotoxinas marinas durante 1991-1992, en la región nororiental de Venezuela", in Tercera Consulta de Expertos Sobre Tecnología de Productos Pesqueros en América Latina, eds Bello, R. A. and Lima dos Santos, C. A. FAO Informe de Pesca. 538, 69-72.
	La Barbera-Sánchez, A., Soler JF, Rojas De Astudillo L, Chang-Yen I. (2004). Paralytic Shellfish Poisoning (PSP) in Margarita Island, Venezuela. Rev. Biol. Trop. 52:89-98.
	La Barbera-Sánchez, A., Gamboa, J., Castillo, I. and Rojas, L. (2008). "Informe de Venezuela", in IOC Regional Science Planning Workshop on Harmful Algal Blooms in IOCARIBE ANCA IV eds Mancera, J. E., . Universidad Nacional de Colombia, sede Caribe, San Andrés isla. 21-25. Accessed at: https://jcomm.info/index.php?option=com_oe&task=viewDocumentRecord&docID=2852 on 2018-06-18.
	Licea, S., Navarrete, A., Rodriguez, R.,Bustillos, J., Martínez, B., Ramirez, C. (2008). Monitoring a Bloom of Pyrodinium bahamense Var. compressum occurring in El Salvador, Guatemala and Mexico (November 2005-March 2006). In 12th Proceedings of the International Conference on Harmful Algae, edited by O. Moestrup, G. Doucette, H. Enevoldsen, A. Godhe, G. Hallegraeff, .B Luckas, et al., 219–20. Co…
	Mancera, J. E., Gavio, B. and Arencibia, G. (2003). Floraciones Algales Nocivas, Intoxicación por microalgas e impactos en el desarrollo regional: El caso de San Andrés Isla Caribe Colombiano. Cuadernillos del Caribe 13: 46-62. Accessed at: https://revistas.unal.edu.co/index.php/ccaribe/article/view/41328 on 2018-06-18.
	Mata, L., Abarca, G., Marranghello, L., and Víquez, R. (1990). Intoxicación paralítica por mariscos (IPM) por Spondylus calcifer contaminado con Pyrodinium bahamense, Costa Rica. Rev. Biol. Trop. 38, 129-136.
	Méndez, S. and Ferrari, G. (2002). "Floraciones algales nocivas en Uruguay: Antecedentes, proyectos en curso y revisión de resultados", in Floraciones Algales Nocivas en el Cono Sur Americano, eds Sar, E. A., Ferrario, M. E., Reguera, B. Instituto Español de Oceanografía. 271-288.
	Muñoz, P., Avaria, S., Sievers, H., Prado, R. (1992). Presencia de dinoflagelados tóxicos del género Dinophysis en el seno Aysén, Chile. Rev. Biol. Mar. 27: 187-212
	Núñez-Vázquez, E. J., (2017). Investigaciones sobre la ciguatera en México: aspectos bioquímicos y biomédicos. Memorias IV Congreso Sociedad Mexicana para el Estudio de los Florecimientos Algales Nocivos p. 23
	OPS, Organización Panamericana de la Salud (1990). Boletín Epidemiológico. 11, 2. Accessed at: cidbimena.desastres.hn/docum/ops/publicaciones/Epidemiologico/BE_v11n2.pdf on 2018-06-17
	Reyes-Vázquez, G., Ferraz-Reyes, E., and Vasquez, E., (1979). "Toxic dinoflagellate blooms in northeastern Venezuela during 1977", in Toxic Dinoflagellate Blooms, eds Taylor, D. L. and Selinger, H. H. Elsevier North Holland. 191-194
	Rosales-Loessener F., (1989). The Guatemala experience with red tides and paralytic shellfish poisoning. In: Hallegraeff G. M, Maclean J. L., (Eds). Biology, Epidemiology and management of Pyrodinium red tides. ICLARM Conference Proceedings 21:49–51.
	Rubio, D.P., Roa, L.G., Soto, D.A., Velasquez, F.J., Gregorcic, N.A, Soto, J.A, Martinez, M.C., Kalergis, A.M., Vasquez, A.E. (2015). Purification and characterization of saxitoxin from Mytilus chilensis of southern Chile. Toxicon 108:147-153.
	Saldate-Castañeda, O., Vázquez-Castellanos, J. L., Galván, J., Sánchez Anguiano, A. and Nazar, A. (1991). Intoxicaciones por toxina paralizante de molusco en Oaxaca. Salud Pública en México, 33, 240-247.
	Santinelli, N., Sastre, V., Esteves, J.L. (2002). Floraciones algales nocivas en Uruguay: Antecedentes, proyectos en curso y revisión de resultados. In. Sar, E.A., Ferrario, M.E., Reguera, B., Eds. p199-207. Floraciones algales nocivas en el Cono Sur Americano. Instituto Español de Oceanografía. España. 304 p.
	Sar, E. A., Sunesen, I., Goya, A.B., Lavigne, A.S., Tapia, E., García, C., Lagos, N. (2012). First report of diarrheic shellfish toxins in mollusks from Buenos Aires provice (Argentina) associated with Dinophysis spp.: Evidence of okadaic acid, dinophysistoxin-1 and their acyl-derivatives. Bol. Soc. Argent. Bot. 47(1-2): 5-14.
	Sar, E. A., Sunesen, I., Lavigne, A. S., Goya, A.B. (2010). Dinophysis spp. Asociadas a detección de toxinas diarreicas en moluscos (DSTs) y a intoxicación diarreica en humanos (provincia de Buenos Aires, Argentina). Rev. Biol. Mar. Oceanogr. 45: 451-460
	Turner, A.D., Tarnovius, S., Goya, A.B. (2014). Paralytic Shellfish Toxins in the marine gastropods Zidona dufresnei and Adelomelon beckii from Argentina: Toxicity and toxins profiles. Journal of Shellfish Research 33(2): 519-530
	Vargas-Montero, M., Freer, E., (2004). "Paralytic Shellfish Poisoning Outbreaks in Costa Rica" in Harmful Algae 2002, eds Steidinger, K. A., Landsberg, J. H., Tomas, C. R. and Vargo, G. A. Florida Fish and Wildlife Conservation Commission, Florida Institute of Oceanography, and Intergovernmental Oceanographic Commission of UNESCO. 482-484.
